# Supplementary material for: Quasi-simultaneous determination of U-Pb and Hf isotope compositions of zircon by excimer laser-ablation multiple-collector ICPMS
Source: Royal Society of Chemistry journal article supplement (doi:10.1039/c1ja10116a), 2011-01-01
Supplement: c1ja10116a.pdf [file c1ja10116a.pdf]

Table 3 Zircon U-Pb analytical results

| Identifier   | Corrected Ratios                  |              |                                  |              |                                  |              | Ages (common lead uncorrected)    |                |                                  |                |                                  |                |              |
|--------------|-----------------------------------|--------------|----------------------------------|--------------|----------------------------------|--------------|-----------------------------------|----------------|----------------------------------|----------------|----------------------------------|----------------|--------------|
|              | $^{207}\text{Pb}/^{206}\text{Pb}$ | 1 $\sigma$ % | $^{207}\text{Pb}/^{235}\text{U}$ | 1 $\sigma$ % | $^{238}\text{U}/^{206}\text{Pb}$ | 1 $\sigma$ % | $^{207}\text{Pb}/^{206}\text{Pb}$ | 2 $\sigma$ abs | $^{207}\text{Pb}/^{235}\text{U}$ | 2 $\sigma$ abs | $^{206}\text{Pb}/^{238}\text{U}$ | 2 $\sigma$ abs | % U-Pb disc* |
| <b>91500</b> |                                   |              |                                  |              |                                  |              |                                   |                |                                  |                |                                  |                |              |
| 91500-1      | 0.0758                            | 0.6          | 1.85                             | 1.6          | 0.177                            | 1.4          | 1090                              | 26             | 1064                             | 20             | 1051                             | 28             | 4            |
| 91500-2      | 0.0749                            | 0.7          | 1.88                             | 1.6          | 0.183                            | 1.4          | 1066                              | 26             | 1076                             | 21             | 1081                             | 29             | 1            |
| 91500-3      | 0.0752                            | 0.6          | 1.85                             | 1.6          | 0.179                            | 1.5          | 1074                              | 23             | 1065                             | 21             | 1060                             | 29             | 1            |
| 91500-4      | 0.0743                            | 0.6          | 1.83                             | 1.3          | 0.179                            | 1.2          | 1050                              | 22             | 1058                             | 17             | 1062                             | 23             | 1            |
| 91500-5      | 0.0750                            | 0.6          | 1.85                             | 1.4          | 0.179                            | 1.2          | 1069                              | 25             | 1064                             | 18             | 1062                             | 24             | 1            |
| 91500-6      | 0.0744                            | 0.6          | 1.85                             | 1.4          | 0.181                            | 1.3          | 1052                              | 22             | 1065                             | 18             | 1071                             | 26             | 2            |
| 91500-7      | 0.0747                            | 0.7          | 1.89                             | 1.4          | 0.184                            | 1.2          | 1060                              | 26             | 1078                             | 18             | 1086                             | 24             | 2            |
| 91500-8      | 0.0753                            | 0.5          | 1.90                             | 1.3          | 0.183                            | 1.2          | 1077                              | 20             | 1080                             | 17             | 1082                             | 24             | 1            |
| 91500-9      | 0.0752                            | 0.5          | 1.82                             | 1.3          | 0.176                            | 1.2          | 1074                              | 19             | 1054                             | 17             | 1045                             | 24             | 3            |
| 91500-10     | 0.0745                            | 0.5          | 1.84                             | 1.2          | 0.179                            | 1.1          | 1055                              | 19             | 1059                             | 16             | 1062                             | 22             | 1            |
| 91500-11     | 0.0744                            | 0.7          | 1.79                             | 1.6          | 0.174                            | 1.4          | 1052                              | 26             | 1041                             | 21             | 1036                             | 28             | 2            |
| 91500-12     | 0.0745                            | 0.6          | 1.83                             | 1.4          | 0.178                            | 1.2          | 1055                              | 23             | 1055                             | 18             | 1054                             | 24             | 0            |
| 91500-13     | 0.0754                            | 0.6          | 1.90                             | 1.9          | 0.183                            | 1.8          | 1079                              | 26             | 1082                             | 26             | 1084                             | 37             | 0            |
| 91500-14     | 0.0744                            | 0.6          | 1.81                             | 1.7          | 0.176                            | 1.6          | 1052                              | 24             | 1048                             | 23             | 1046                             | 32             | 1            |
| 91500-15     | 0.0749                            | 0.7          | 1.88                             | 1.4          | 0.182                            | 1.3          | 1066                              | 26             | 1074                             | 19             | 1078                             | 25             | 1            |
| 91500-16     | 0.0750                            | 0.6          | 1.90                             | 1.3          | 0.184                            | 1.2          | 1069                              | 23             | 1080                             | 17             | 1086                             | 24             | 2            |
| 91500-17     | 0.0764                            | 0.6          | 1.88                             | 1.2          | 0.179                            | 1.1          | 1106                              | 25             | 1075                             | 17             | 1060                             | 21             | 4            |
| 91500-18     | 0.0757                            | 0.6          | 1.90                             | 1.3          | 0.182                            | 1.2          | 1087                              | 23             | 1079                             | 17             | 1076                             | 23             | 1            |
| 91500-19     | 0.0750                            | 0.6          | 1.84                             | 1.6          | 0.178                            | 1.5          | 1069                              | 26             | 1058                             | 21             | 1053                             | 28             | 1            |
| 91500-20     | 0.0751                            | 0.6          | 1.86                             | 1.4          | 0.180                            | 1.2          | 1071                              | 23             | 1067                             | 18             | 1065                             | 24             | 1            |
| 91500-21     | 0.0747                            | 0.4          | 1.87                             | 1.6          | 0.182                            | 1.5          | 1060                              | 18             | 1071                             | 20             | 1076                             | 29             | 1            |

|            |        |     |        |     |        |     |      |    |      |    |      |    |    |
|------------|--------|-----|--------|-----|--------|-----|------|----|------|----|------|----|----|
| 91500-22   | 0.0753 | 0.6 | 1.86   | 1.6 | 0.179  | 1.5 | 1077 | 23 | 1067 | 22 | 1062 | 30 | 1  |
| 91500-23   | 0.0743 | 0.5 | 1.83   | 1.6 | 0.179  | 1.6 | 1050 | 19 | 1057 | 22 | 1061 | 31 | 1  |
| 91500-24   | 0.0748 | 0.6 | 1.87   | 1.6 | 0.181  | 1.5 | 1063 | 25 | 1071 | 21 | 1075 | 29 | 1  |
| 91500-25   | 0.0750 | 0.5 | 1.87   | 1.5 | 0.181  | 1.4 | 1069 | 21 | 1069 | 19 | 1070 | 27 | 0  |
| 91500-26   | 0.0764 | 0.6 | 1.93   | 1.3 | 0.184  | 1.2 | 1106 | 25 | 1093 | 18 | 1087 | 24 | 2  |
| 91500-27   | 0.0752 | 0.5 | 1.87   | 1.2 | 0.180  | 1.0 | 1074 | 20 | 1070 | 15 | 1068 | 20 | 1  |
| 91500-28   | 0.0762 | 0.7 | 1.88   | 1.6 | 0.179  | 1.4 | 1100 | 28 | 1075 | 21 | 1063 | 28 | 3  |
| 91500-29   | 0.0764 | 0.6 | 1.88   | 1.5 | 0.178  | 1.3 | 1106 | 25 | 1073 | 20 | 1058 | 26 | 4  |
| 91500-30   | 0.0751 | 0.5 | 1.84   | 1.3 | 0.177  | 1.2 | 1071 | 19 | 1059 | 17 | 1053 | 24 | 2  |
| 91500-31   | 0.0749 | 0.5 | 1.90   | 1.4 | 0.184  | 1.3 | 1066 | 22 | 1080 | 18 | 1087 | 25 | 2  |
| 91500-32   | 0.0742 | 0.5 | 1.80   | 1.3 | 0.176  | 1.2 | 1047 | 19 | 1045 | 17 | 1045 | 23 | 0  |
| 91500-33   | 0.0748 | 0.5 | 1.85   | 1.5 | 0.179  | 1.4 | 1063 | 21 | 1062 | 20 | 1062 | 28 | 0  |
| 91500-34   | 0.0746 | 0.5 | 1.86   | 1.5 | 0.181  | 1.5 | 1058 | 21 | 1068 | 20 | 1074 | 29 | 1  |
| 91500-35   | 0.0753 | 0.5 | 1.88   | 1.3 | 0.181  | 1.2 | 1077 | 22 | 1075 | 17 | 1074 | 23 | 0  |
| <b>CZ3</b> |        |     |        |     |        |     |      |    |      |    |      |    |    |
| CZ3-1      | 0.0596 | 0.5 | 0.7453 | 1.4 | 0.0907 | 1.3 | 589  | 22 | 566  | 12 | 560  | 14 | 5  |
| CZ3-2      | 0.0600 | 0.6 | 0.7437 | 1.1 | 0.0899 | 1.0 | 604  | 24 | 565  | 10 | 555  | 11 | 8  |
| CZ3-3      | 0.0594 | 0.6 | 0.7559 | 1.5 | 0.0923 | 1.4 | 582  | 24 | 572  | 13 | 569  | 15 | 2  |
| CZ3-4      | 0.0595 | 0.6 | 0.7548 | 1.4 | 0.0920 | 1.3 | 585  | 24 | 571  | 12 | 567  | 14 | 3  |
| CZ3-5      | 0.0605 | 0.5 | 0.7583 | 1.4 | 0.0909 | 1.3 | 622  | 22 | 573  | 12 | 561  | 14 | 10 |
| CZ3-6      | 0.0581 | 0.5 | 0.7250 | 1.1 | 0.0905 | 1.0 | 534  | 21 | 554  | 9  | 558  | 11 | 5  |
| CZ3-7      | 0.0590 | 0.7 | 0.7387 | 1.3 | 0.0908 | 1.1 | 567  | 28 | 562  | 11 | 560  | 12 | 1  |
| CZ3-8      | 0.0587 | 0.5 | 0.7284 | 1.5 | 0.0900 | 1.4 | 556  | 23 | 556  | 13 | 556  | 15 | 0  |
| CZ3-9      | 0.0578 | 0.6 | 0.7316 | 1.5 | 0.0918 | 1.4 | 522  | 25 | 557  | 13 | 566  | 15 | 8  |
| CZ3-10     | 0.0598 | 0.6 | 0.7619 | 1.7 | 0.0924 | 1.6 | 596  | 26 | 575  | 15 | 570  | 17 | 4  |
| CZ3-11     | 0.0583 | 0.5 | 0.7436 | 1.4 | 0.0925 | 1.3 | 541  | 23 | 564  | 12 | 570  | 14 | 5  |

|                  |        |     |        |     |        |     |     |    |     |    |     |    |    |
|------------------|--------|-----|--------|-----|--------|-----|-----|----|-----|----|-----|----|----|
| CZ3-12           | 0.0581 | 0.5 | 0.7306 | 1.3 | 0.0912 | 1.2 | 534 | 23 | 557 | 11 | 563 | 13 | 5  |
| CZ3-13           | 0.0595 | 0.6 | 0.7539 | 1.7 | 0.0919 | 1.6 | 585 | 24 | 571 | 14 | 567 | 17 | 3  |
| CZ3-14           | 0.0593 | 0.6 | 0.7449 | 1.7 | 0.0911 | 1.6 | 578 | 24 | 565 | 14 | 562 | 17 | 3  |
| CZ3-15           | 0.0585 | 0.5 | 0.7340 | 1.7 | 0.0910 | 1.6 | 549 | 23 | 559 | 14 | 561 | 17 | 2  |
| CZ3-16           | 0.0596 | 0.6 | 0.7478 | 1.5 | 0.0910 | 1.4 | 589 | 24 | 567 | 13 | 561 | 15 | 5  |
| CZ3-17           | 0.0589 | 0.5 | 0.7309 | 1.4 | 0.0900 | 1.3 | 563 | 23 | 557 | 12 | 556 | 14 | 1  |
| CZ3-18           | 0.0599 | 0.7 | 0.7607 | 1.5 | 0.0921 | 1.4 | 600 | 30 | 574 | 13 | 568 | 15 | 5  |
| CZ3-19           | 0.0591 | 0.6 | 0.7627 | 1.6 | 0.0936 | 1.4 | 571 | 26 | 576 | 14 | 577 | 16 | 1  |
| CZ3-20           | 0.0600 | 0.7 | 0.7685 | 1.7 | 0.0929 | 1.6 | 604 | 29 | 579 | 15 | 573 | 17 | 5  |
| CZ3-21           | 0.0584 | 0.5 | 0.7432 | 1.0 | 0.0923 | 0.9 | 545 | 21 | 564 | 9  | 569 | 10 | 4  |
| CZ3-22           | 0.0586 | 0.5 | 0.7361 | 1.1 | 0.0911 | 1.0 | 552 | 23 | 560 | 10 | 562 | 11 | 2  |
| CZ3-23           | 0.0588 | 0.6 | 0.7467 | 1.6 | 0.0921 | 1.5 | 560 | 27 | 566 | 14 | 568 | 16 | 1  |
| CZ3-24           | 0.0597 | 0.8 | 0.7540 | 1.6 | 0.0916 | 1.4 | 593 | 33 | 571 | 14 | 565 | 15 | 5  |
| CZ3-25           | 0.0600 | 0.9 | 0.7694 | 1.6 | 0.0930 | 1.4 | 604 | 39 | 579 | 14 | 573 | 15 | 5  |
| CZ3-26           | 0.0587 | 0.7 | 0.7470 | 1.5 | 0.0923 | 1.4 | 556 | 30 | 567 | 13 | 569 | 15 | 2  |
| CZ3-27           | 0.0596 | 0.5 | 0.7453 | 1.4 | 0.0907 | 1.3 | 589 | 22 | 566 | 12 | 560 | 14 | 5  |
| CZ3-28           | 0.0599 | 0.6 | 0.7648 | 1.1 | 0.0926 | 1.0 | 600 | 24 | 577 | 10 | 571 | 11 | 5  |
| CZ3-29           | 0.0593 | 0.6 | 0.7628 | 1.5 | 0.0933 | 1.4 | 578 | 24 | 576 | 13 | 575 | 15 | 1  |
| CZ3-30           | 0.0581 | 0.6 | 0.7330 | 1.5 | 0.0915 | 1.4 | 534 | 25 | 558 | 13 | 564 | 15 | 6  |
| CZ3-31           | 0.0582 | 0.6 | 0.7214 | 1.2 | 0.0899 | 1.1 | 537 | 25 | 552 | 11 | 555 | 12 | 3  |
| CZ3-32           | 0.0593 | 0.6 | 0.7498 | 1.5 | 0.0917 | 1.4 | 578 | 24 | 568 | 13 | 566 | 15 | 2  |
| CZ3-33           | 0.0604 | 0.5 | 0.7670 | 1.4 | 0.0921 | 1.3 | 618 | 20 | 578 | 12 | 568 | 14 | 8  |
| <b>Plesovice</b> |        |     |        |     |        |     |     |    |     |    |     |    |    |
| PL-1             | 0.0530 | 0.6 | 0.3910 | 1.5 | 0.0535 | 1.3 | 329 | 26 | 335 | 8  | 336 | 9  | 2  |
| PL-2             | 0.0542 | 0.6 | 0.4021 | 1.6 | 0.0538 | 1.4 | 379 | 25 | 343 | 9  | 338 | 10 | 11 |
| PL-3             | 0.0544 | 0.5 | 0.3938 | 1.5 | 0.0525 | 1.4 | 388 | 23 | 337 | 8  | 330 | 9  | 15 |

|       |        |     |        |     |        |     |     |    |     |    |     |    |    |
|-------|--------|-----|--------|-----|--------|-----|-----|----|-----|----|-----|----|----|
| PL-4  | 0.0541 | 0.6 | 0.4006 | 1.6 | 0.0537 | 1.5 | 375 | 28 | 342 | 9  | 337 | 10 | 10 |
| PL-5  | 0.0536 | 0.6 | 0.3991 | 1.6 | 0.0540 | 1.4 | 354 | 26 | 341 | 9  | 339 | 10 | 4  |
| PL-6  | 0.0545 | 0.5 | 0.3968 | 1.6 | 0.0528 | 1.5 | 392 | 21 | 339 | 9  | 332 | 10 | 15 |
| PL-7  | 0.0528 | 0.5 | 0.3960 | 1.3 | 0.0544 | 1.2 | 320 | 22 | 339 | 8  | 341 | 8  | 7  |
| PL-8  | 0.0531 | 0.6 | 0.3939 | 1.6 | 0.0538 | 1.4 | 333 | 26 | 337 | 9  | 338 | 10 | 1  |
| PL-9  | 0.0544 | 0.6 | 0.3923 | 1.6 | 0.0523 | 1.5 | 388 | 25 | 336 | 9  | 329 | 10 | 15 |
| PL-10 | 0.0541 | 0.7 | 0.4006 | 1.6 | 0.0537 | 1.5 | 375 | 30 | 342 | 9  | 337 | 10 | 10 |
| PL-11 | 0.0538 | 0.5 | 0.4035 | 1.6 | 0.0544 | 1.5 | 363 | 24 | 344 | 9  | 341 | 10 | 6  |
| PL-12 | 0.0527 | 0.5 | 0.3858 | 1.5 | 0.0531 | 1.4 | 316 | 24 | 331 | 8  | 334 | 9  | 6  |
| PL-13 | 0.0540 | 0.5 | 0.3983 | 1.5 | 0.0535 | 1.5 | 371 | 21 | 340 | 9  | 336 | 10 | 9  |
| PL-14 | 0.0540 | 0.5 | 0.3812 | 1.2 | 0.0512 | 1.1 | 371 | 21 | 328 | 6  | 322 | 7  | 13 |
| PL-15 | 0.0542 | 0.6 | 0.4043 | 1.2 | 0.0541 | 1.1 | 379 | 25 | 345 | 7  | 340 | 7  | 10 |
| PL-16 | 0.0530 | 0.6 | 0.3880 | 1.5 | 0.0531 | 1.4 | 329 | 26 | 333 | 8  | 334 | 9  | 1  |
| PL-17 | 0.0540 | 0.6 | 0.3968 | 1.8 | 0.0533 | 1.7 | 371 | 28 | 339 | 10 | 335 | 11 | 10 |
| PL-18 | 0.0540 | 0.7 | 0.3983 | 1.6 | 0.0535 | 1.5 | 371 | 30 | 340 | 9  | 336 | 10 | 9  |
| PL-19 | 0.0551 | 0.6 | 0.4080 | 1.4 | 0.0537 | 1.2 | 416 | 27 | 347 | 8  | 337 | 8  | 19 |
| PL-20 | 0.0545 | 0.7 | 0.4035 | 1.6 | 0.0537 | 1.5 | 392 | 32 | 344 | 9  | 337 | 10 | 14 |
| PL-21 | 0.0528 | 0.6 | 0.3909 | 1.5 | 0.0537 | 1.3 | 320 | 29 | 335 | 8  | 337 | 9  | 5  |
| PL-22 | 0.0544 | 0.8 | 0.4005 | 1.5 | 0.0534 | 1.3 | 388 | 34 | 342 | 9  | 335 | 9  | 13 |
| PL-23 | 0.0537 | 0.5 | 0.4013 | 1.4 | 0.0542 | 1.3 | 358 | 24 | 343 | 8  | 340 | 9  | 5  |
| PL-24 | 0.0530 | 0.5 | 0.3924 | 1.1 | 0.0537 | 1.0 | 329 | 24 | 336 | 7  | 337 | 7  | 3  |
| PL-25 | 0.0542 | 0.6 | 0.4006 | 1.6 | 0.0536 | 1.5 | 379 | 25 | 342 | 9  | 337 | 10 | 11 |
| PL-26 | 0.0547 | 0.5 | 0.3982 | 1.5 | 0.0528 | 1.4 | 400 | 23 | 340 | 8  | 332 | 9  | 17 |
| PL-27 | 0.0541 | 0.6 | 0.4050 | 1.5 | 0.0543 | 1.4 | 375 | 25 | 345 | 9  | 341 | 10 | 9  |
| PL-28 | 0.0543 | 0.5 | 0.3976 | 1.6 | 0.0531 | 1.5 | 384 | 23 | 340 | 9  | 334 | 10 | 13 |
| PL-29 | 0.0538 | 0.7 | 0.3969 | 1.1 | 0.0535 | 0.9 | 363 | 30 | 339 | 6  | 336 | 6  | 7  |

|                |        |     |        |     |        |     |     |    |     |    |     |    |    |
|----------------|--------|-----|--------|-----|--------|-----|-----|----|-----|----|-----|----|----|
| PL-30          | 0.0532 | 0.5 | 0.4034 | 2.0 | 0.0550 | 2.0 | 337 | 24 | 344 | 12 | 345 | 13 | 2  |
| PL-31          | 0.0532 | 0.7 | 0.3895 | 1.1 | 0.0531 | 0.8 | 337 | 30 | 334 | 6  | 334 | 6  | 1  |
| PL-32          | 0.0542 | 0.5 | 0.3968 | 1.1 | 0.0531 | 1.0 | 379 | 21 | 339 | 6  | 334 | 7  | 12 |
| PL-33          | 0.0540 | 0.5 | 0.4073 | 1.3 | 0.0547 | 1.2 | 371 | 21 | 347 | 8  | 343 | 8  | 7  |
| PL-34          | 0.0531 | 0.5 | 0.3961 | 1.1 | 0.0541 | 1.0 | 333 | 22 | 339 | 6  | 340 | 7  | 2  |
| PL-35          | 0.0538 | 0.5 | 0.3991 | 1.3 | 0.0538 | 1.2 | 363 | 24 | 341 | 8  | 338 | 8  | 7  |
| PL-36          | 0.0543 | 0.5 | 0.4058 | 1.6 | 0.0542 | 1.5 | 384 | 21 | 346 | 9  | 340 | 10 | 11 |
| PL-37          | 0.0525 | 0.5 | 0.3931 | 1.5 | 0.0543 | 1.4 | 307 | 22 | 337 | 9  | 341 | 10 | 11 |
| <b>MG136-1</b> |        |     |        |     |        |     |     |    |     |    |     |    |    |
| MG136-1-1      | 0.0534 | 0.6 | 0.3542 | 1.6 | 0.0481 | 1.5 | 346 | 28 | 308 | 8  | 303 | 9  | 12 |
| MG136-1-2      | 0.0527 | 0.6 | 0.3597 | 1.6 | 0.0495 | 1.5 | 316 | 28 | 312 | 9  | 311 | 9  | 1  |
| MG136-1-3      | 0.0524 | 0.5 | 0.3482 | 1.4 | 0.0482 | 1.2 | 303 | 25 | 303 | 7  | 303 | 7  | 0  |
| MG136-1-4      | 0.0531 | 0.5 | 0.3639 | 2.0 | 0.0497 | 1.9 | 333 | 23 | 315 | 11 | 313 | 12 | 6  |
| MG136-1-5      | 0.0524 | 0.6 | 0.3454 | 1.8 | 0.0478 | 1.7 | 303 | 27 | 301 | 9  | 301 | 10 | 1  |
| MG136-1-6      | 0.0527 | 0.5 | 0.3590 | 1.4 | 0.0494 | 1.3 | 316 | 23 | 311 | 8  | 311 | 8  | 2  |
| MG136-1-7      | 0.0529 | 0.6 | 0.3538 | 1.7 | 0.0485 | 1.5 | 325 | 28 | 308 | 9  | 305 | 9  | 6  |
| MG136-1-8      | 0.0523 | 0.5 | 0.3505 | 1.3 | 0.0486 | 1.2 | 299 | 21 | 305 | 7  | 306 | 7  | 2  |
| MG136-1-9      | 0.0528 | 0.5 | 0.3538 | 1.3 | 0.0486 | 1.2 | 320 | 21 | 308 | 7  | 306 | 7  | 4  |
| MG136-1-10     | 0.0523 | 0.5 | 0.3505 | 1.7 | 0.0486 | 1.6 | 299 | 21 | 305 | 9  | 306 | 10 | 2  |
| MG136-1-11     | 0.0527 | 0.6 | 0.3575 | 1.6 | 0.0492 | 1.5 | 316 | 28 | 310 | 9  | 310 | 9  | 2  |
| MG136-1-12     | 0.0528 | 0.5 | 0.3567 | 1.5 | 0.049  | 1.4 | 320 | 25 | 310 | 8  | 308 | 9  | 4  |
| MG136-1-13     | 0.0538 | 0.6 | 0.3694 | 1.4 | 0.0498 | 1.2 | 363 | 27 | 319 | 7  | 313 | 7  | 14 |
| MG136-1-14     | 0.0529 | 0.5 | 0.3567 | 1.2 | 0.0489 | 1.0 | 325 | 25 | 310 | 6  | 308 | 6  | 5  |
| MG136-1-15     | 0.0524 | 0.6 | 0.3511 | 1.3 | 0.0486 | 1.1 | 303 | 28 | 306 | 7  | 306 | 7  | 1  |
| MG136-1-16     | 0.0524 | 0.5 | 0.3417 | 1.6 | 0.0473 | 1.5 | 303 | 25 | 298 | 8  | 298 | 9  | 2  |
| MG136-1-17     | 0.0528 | 0.6 | 0.3625 | 1.4 | 0.0498 | 1.2 | 320 | 28 | 314 | 7  | 313 | 7  | 2  |

|            |        |     |        |     |        |     |     |    |     |   |     |   |    |
|------------|--------|-----|--------|-----|--------|-----|-----|----|-----|---|-----|---|----|
| MG136-1-18 | 0.0538 | 0.5 | 0.3598 | 1.3 | 0.0485 | 1.1 | 363 | 24 | 312 | 7 | 305 | 7 | 16 |
| MG136-1-19 | 0.0533 | 0.6 | 0.3623 | 1.4 | 0.0493 | 1.2 | 342 | 28 | 314 | 7 | 310 | 7 | 9  |
| MG136-1-20 | 0.0536 | 0.5 | 0.3592 | 1.5 | 0.0486 | 1.4 | 354 | 24 | 312 | 8 | 306 | 9 | 14 |
| MG136-1-21 | 0.0538 | 0.4 | 0.3590 | 1.4 | 0.0484 | 1.3 | 363 | 19 | 311 | 8 | 305 | 8 | 16 |
| MG136-1-22 | 0.0524 | 0.5 | 0.3547 | 1.4 | 0.0491 | 1.3 | 303 | 25 | 308 | 8 | 309 | 8 | 2  |
| MG136-1-23 | 0.0526 | 0.5 | 0.3612 | 1.3 | 0.0498 | 1.2 | 312 | 21 | 313 | 7 | 313 | 7 | 1  |
| MG136-1-24 | 0.053  | 0.6 | 0.3625 | 1.3 | 0.0496 | 1.2 | 329 | 26 | 314 | 7 | 312 | 7 | 5  |
| MG136-1-25 | 0.0529 | 0.5 | 0.3479 | 1.3 | 0.0477 | 1.3 | 325 | 21 | 303 | 7 | 300 | 7 | 7  |
| MG136-1-26 | 0.0528 | 0.6 | 0.3509 | 1.6 | 0.0482 | 1.5 | 320 | 28 | 305 | 8 | 303 | 9 | 5  |
| MG136-1-27 | 0.0529 | 0.5 | 0.3559 | 1.3 | 0.0488 | 1.2 | 325 | 21 | 309 | 7 | 307 | 7 | 5  |
| MG136-1-28 | 0.0526 | 0.7 | 0.3575 | 1.7 | 0.0493 | 1.5 | 312 | 30 | 310 | 9 | 310 | 9 | 0  |
| MG136-1-29 | 0.0530 | 0.6 | 0.3552 | 1.7 | 0.0486 | 1.5 | 329 | 28 | 309 | 9 | 306 | 9 | 7  |
| MG136-1-30 | 0.0529 | 0.5 | 0.3508 | 1.3 | 0.0481 | 1.2 | 325 | 21 | 305 | 7 | 303 | 7 | 7  |

\* Discordance calculated as  $\text{abs}((1 - ({}^{206}\text{Pb}/{}^{238}\text{U age}/{}^{207}\text{Pb}/{}^{206}\text{Pb age})) * 100)$

Table 4 Zircon Hf isotope analytical results

| Identifier   | Corrected Ratios                  |                |                                   |                |                                   |                |
|--------------|-----------------------------------|----------------|-----------------------------------|----------------|-----------------------------------|----------------|
|              | $^{176}\text{Hf}/^{177}\text{Hf}$ | 1 $\sigma$ abs | $^{176}\text{Lu}/^{177}\text{Hf}$ | 1 $\sigma$ abs | $^{176}\text{Yb}/^{177}\text{Hf}$ | 1 $\sigma$ abs |
| <b>91500</b> |                                   |                |                                   |                |                                   |                |
| 91500-1      | 0.282339                          | 0.000016       | 0.000318                          | 0.000001       | 0.007647                          | 0.000013       |
| 91500-2      | 0.282349                          | 0.000029       | 0.000316                          | 0.000001       | 0.007575                          | 0.000019       |
| 91500-3      | 0.282305                          | 0.000018       | 0.000318                          | 0.000001       | 0.007748                          | 0.000020       |
| 91500-4      | 0.282290                          | 0.000024       | 0.000315                          | 0.000001       | 0.007542                          | 0.000020       |
| 91500-5      | 0.282280                          | 0.000019       | 0.000312                          | 0.000001       | 0.007633                          | 0.000016       |
| 91500-6      | 0.282303                          | 0.000024       | 0.000313                          | 0.000001       | 0.007636                          | 0.000015       |
| 91500-7      | 0.282309                          | 0.000022       | 0.000312                          | 0.000001       | 0.007634                          | 0.000021       |
| 91500-8      | 0.282292                          | 0.000016       | 0.000319                          | 0.000001       | 0.007585                          | 0.000021       |
| 91500-9      | 0.282344                          | 0.000026       | 0.000320                          | 0.000001       | 0.007730                          | 0.000041       |
| 91500-10     | 0.282325                          | 0.000027       | 0.000318                          | 0.000001       | 0.007752                          | 0.000029       |
| 91500-11     | 0.282323                          | 0.000032       | 0.000318                          | 0.000001       | 0.007625                          | 0.000032       |
| 91500-12     | 0.282268                          | 0.000028       | 0.000316                          | 0.000001       | 0.007753                          | 0.000012       |
| 91500-13     | 0.282321                          | 0.000021       | 0.000313                          | 0.000001       | 0.007658                          | 0.000011       |
| 91500-14     | 0.282337                          | 0.000023       | 0.000313                          | 0.000001       | 0.007754                          | 0.000003       |
| 91500-15     | 0.282275                          | 0.000032       | 0.000321                          | 0.000001       | 0.007859                          | 0.000008       |
| 91500-16     | 0.282265                          | 0.000023       | 0.000316                          | 0.000001       | 0.007818                          | 0.000018       |
| 91500-17     | 0.282320                          | 0.000022       | 0.000325                          | 0.000001       | 0.007996                          | 0.000018       |
| 91500-18     | 0.282290                          | 0.000035       | 0.000327                          | 0.000001       | 0.007914                          | 0.000011       |
| 91500-19     | 0.282326                          | 0.000032       | 0.000318                          | 0.000001       | 0.007625                          | 0.000027       |
| 91500-20     | 0.282318                          | 0.000023       | 0.000316                          | 0.000001       | 0.007753                          | 0.000034       |
| 91500-21     | 0.282335                          | 0.000021       | 0.000313                          | 0.000001       | 0.007658                          | 0.000021       |
| 91500-22     | 0.282257                          | 0.000023       | 0.000313                          | 0.000001       | 0.007754                          | 0.000017       |

|            |          |          |          |          |          |          |
|------------|----------|----------|----------|----------|----------|----------|
| 91500-23   | 0.282341 | 0.000024 | 0.000324 | 0.000001 | 0.007791 | 0.000011 |
| 91500-24   | 0.282290 | 0.000022 | 0.000321 | 0.000001 | 0.007685 | 0.000012 |
| 91500-25   | 0.282345 | 0.000032 | 0.000316 | 0.000001 | 0.007534 | 0.000013 |
| 91500-26   | 0.282263 | 0.000023 | 0.000325 | 0.000001 | 0.007996 | 0.000014 |
| 91500-27   | 0.282281 | 0.000024 | 0.000327 | 0.000001 | 0.007914 | 0.000012 |
| 91500-28   | 0.282317 | 0.000031 | 0.000316 | 0.000001 | 0.007648 | 0.000008 |
| 91500-29   | 0.282347 | 0.000027 | 0.000317 | 0.000001 | 0.007612 | 0.000008 |
| 91500-30   | 0.282337 | 0.000024 | 0.000319 | 0.000001 | 0.007647 | 0.000022 |
| 91500-31   | 0.282288 | 0.000027 | 0.000317 | 0.000001 | 0.007612 | 0.000019 |
| 91500-32   | 0.282273 | 0.000029 | 0.000319 | 0.000001 | 0.007647 | 0.000013 |
| 91500-33   | 0.282342 | 0.000033 | 0.000313 | 0.000001 | 0.007585 | 0.000018 |
| 91500-34   | 0.282329 | 0.000029 | 0.000319 | 0.000001 | 0.007573 | 0.000013 |
| 91500-35   | 0.282264 | 0.000025 | 0.000326 | 0.000001 | 0.007728 | 0.000021 |
| <b>CZ3</b> |          |          |          |          |          |          |
| CZ3-1      | 0.281807 | 0.000030 | 0.000036 | 0.000002 | 0.000974 | 0.000046 |
| CZ3-2      | 0.281711 | 0.000026 | 0.000036 | 0.000002 | 0.000958 | 0.000055 |
| CZ3-3      | 0.281773 | 0.000034 | 0.000035 | 0.000002 | 0.000979 | 0.000032 |
| CZ3-4      | 0.281777 | 0.000033 | 0.000036 | 0.000002 | 0.001018 | 0.000063 |
| CZ3-5      | 0.281801 | 0.000027 | 0.000035 | 0.000002 | 0.001009 | 0.000041 |
| CZ3-6      | 0.281657 | 0.000014 | 0.000036 | 0.000002 | 0.001013 | 0.000125 |
| CZ3-7      | 0.281715 | 0.000014 | 0.000036 | 0.000002 | 0.001009 | 0.000052 |
| CZ3-8      | 0.281739 | 0.000027 | 0.000036 | 0.000002 | 0.001015 | 0.000049 |
| CZ3-9      | 0.281691 | 0.000031 | 0.000036 | 0.000002 | 0.001034 | 0.000038 |
| CZ3-10     | 0.281693 | 0.000034 | 0.000036 | 0.000002 | 0.00101  | 0.000065 |
| CZ3-11     | 0.281735 | 0.000030 | 0.000036 | 0.000002 | 0.000998 | 0.000021 |
| CZ3-12     | 0.281654 | 0.000024 | 0.000037 | 0.000002 | 0.000983 | 0.000074 |

|                  |          |          |          |          |          |          |
|------------------|----------|----------|----------|----------|----------|----------|
| CZ3-13           | 0.281737 | 0.000030 | 0.000036 | 0.000002 | 0.00101  | 0.000056 |
| CZ3-14           | 0.281718 | 0.000040 | 0.000036 | 0.000002 | 0.001028 | 0.000144 |
| CZ3-15           | 0.281652 | 0.000036 | 0.000037 | 0.000002 | 0.000992 | 0.000070 |
| CZ3-16           | 0.281796 | 0.000030 | 0.000036 | 0.000002 | 0.001004 | 0.000165 |
| CZ3-17           | 0.281806 | 0.000031 | 0.000037 | 0.000002 | 0.000993 | 0.000113 |
| CZ3-18           | 0.281702 | 0.000028 | 0.000036 | 0.000002 | 0.000996 | 0.000072 |
| CZ3-19           | 0.281775 | 0.000031 | 0.000036 | 0.000002 | 0.001025 | 0.000049 |
| CZ3-20           | 0.2817   | 0.000028 | 0.000036 | 0.000002 | 0.000971 | 0.000063 |
| CZ3-21           | 0.281754 | 0.000043 | 0.000037 | 0.000002 | 0.000964 | 0.000066 |
| CZ3-22           | 0.281649 | 0.000033 | 0.000038 | 0.000002 | 0.000971 | 0.000065 |
| CZ3-23           | 0.281802 | 0.000021 | 0.000036 | 0.000002 | 0.000968 | 0.000092 |
| CZ3-24           | 0.281731 | 0.000043 | 0.000037 | 0.000002 | 0.000964 | 0.000057 |
| CZ3-25           | 0.281706 | 0.000033 | 0.000038 | 0.000002 | 0.000971 | 0.000040 |
| CZ3-26           | 0.281778 | 0.000021 | 0.000036 | 0.000002 | 0.000968 | 0.000052 |
| CZ3-27           | 0.281764 | 0.000033 | 0.000036 | 0.000002 | 0.000974 | 0.000022 |
| CZ3-28           | 0.281659 | 0.000031 | 0.000036 | 0.000002 | 0.000958 | 0.000026 |
| CZ3-29           | 0.28171  | 0.000034 | 0.000035 | 0.000002 | 0.000979 | 0.000022 |
| CZ3-30           | 0.281733 | 0.000045 | 0.000036 | 0.000002 | 0.000958 | 0.000023 |
| CZ3-31           | 0.281745 | 0.000034 | 0.000035 | 0.000002 | 0.000979 | 0.000014 |
| CZ3-32           | 0.281749 | 0.000042 | 0.000036 | 0.000002 | 0.001018 | 0.000012 |
| CZ3-33           | 0.281705 | 0.000038 | 0.000036 | 0.000002 | 0.000974 | 0.000234 |
| <b>Plesovice</b> |          |          |          |          |          |          |
| PL-1             | 0.282513 | 0.000012 | 0.000117 | 0.000001 | 0.004181 | 0.000006 |
| PL-2             | 0.282417 | 0.000019 | 0.000099 | 0.000001 | 0.003422 | 0.000006 |
| PL-3             | 0.282509 | 0.000009 | 0.000139 | 0.000001 | 0.005027 | 0.000009 |
| PL-4             | 0.282508 | 0.000037 | 0.000142 | 0.000001 | 0.004917 | 0.000012 |

|       |          |          |          |          |          |          |
|-------|----------|----------|----------|----------|----------|----------|
| PL-5  | 0.282457 | 0.000044 | 0.000137 | 0.000001 | 0.004818 | 0.000013 |
| PL-6  | 0.282519 | 0.000024 | 0.000125 | 0.000001 | 0.004516 | 0.000015 |
| PL-7  | 0.282493 | 0.000022 | 0.000135 | 0.000001 | 0.004544 | 0.000016 |
| PL-8  | 0.282507 | 0.000007 | 0.000101 | 0.000001 | 0.003567 | 0.000006 |
| PL-9  | 0.282471 | 0.000012 | 0.00014  | 0.000001 | 0.004879 | 0.000011 |
| PL-10 | 0.282501 | 0.000024 | 0.000165 | 0.000001 | 0.005800 | 0.000013 |
| PL-11 | 0.282486 | 0.000022 | 0.000135 | 0.000001 | 0.004544 | 0.000013 |
| PL-12 | 0.282481 | 0.000029 | 0.000176 | 0.000001 | 0.005967 | 0.000018 |
| PL-13 | 0.282468 | 0.000035 | 0.000183 | 0.000001 | 0.006297 | 0.000022 |
| PL-14 | 0.282474 | 0.000046 | 0.000113 | 0.000001 | 0.003896 | 0.000016 |
| PL-15 | 0.282466 | 0.000040 | 0.000188 | 0.000001 | 0.006307 | 0.000007 |
| PL-16 | 0.282487 | 0.000019 | 0.000175 | 0.000001 | 0.006036 | 0.000006 |
| PL-17 | 0.282438 | 0.000028 | 0.000118 | 0.000001 | 0.004241 | 0.000008 |
| PL-18 | 0.282529 | 0.000026 | 0.000164 | 0.000001 | 0.005696 | 0.000018 |
| PL-19 | 0.282413 | 0.000040 | 0.000164 | 0.000001 | 0.005584 | 0.000019 |
| PL-20 | 0.28247  | 0.000024 | 0.000143 | 0.000001 | 0.004995 | 0.000004 |
| PL-21 | 0.282559 | 0.000026 | 0.000164 | 0.000001 | 0.005696 | 0.000010 |
| PL-22 | 0.282511 | 0.000041 | 0.000156 | 0.000001 | 0.005432 | 0.000008 |
| PL-23 | 0.282463 | 0.000041 | 0.00014  | 0.000001 | 0.004751 | 0.000011 |
| PL-24 | 0.282525 | 0.000030 | 0.000143 | 0.000001 | 0.004963 | 0.000016 |
| PL-25 | 0.282444 | 0.000041 | 0.000156 | 0.000001 | 0.005432 | 0.000026 |
| PL-26 | 0.282508 | 0.000037 | 0.000142 | 0.000001 | 0.004917 | 0.000023 |
| PL-27 | 0.282487 | 0.000044 | 0.000137 | 0.000001 | 0.004818 | 0.000015 |
| PL-28 | 0.282487 | 0.000033 | 0.000135 | 0.000001 | 0.004848 | 0.000015 |
| PL-29 | 0.282551 | 0.000037 | 0.000142 | 0.000001 | 0.004917 | 0.000028 |
| PL-30 | 0.282539 | 0.000044 | 0.000137 | 0.000001 | 0.004818 | 0.000029 |

|                |          |          |          |          |          |          |
|----------------|----------|----------|----------|----------|----------|----------|
| PL-31          | 0.282464 | 0.000026 | 0.000096 | 0.000001 | 0.003517 | 0.000005 |
| PL-32          | 0.282447 | 0.000018 | 0.000114 | 0.000001 | 0.004075 | 0.000003 |
| PL-33          | 0.282481 | 0.000016 | 0.000101 | 0.000001 | 0.003753 | 0.000022 |
| PL-34          | 0.282469 | 0.000020 | 0.000093 | 0.000002 | 0.003503 | 0.000053 |
| PL-35          | 0.282478 | 0.000025 | 0.000144 | 0.000001 | 0.005066 | 0.000007 |
| PL-36          | 0.28247  | 0.000028 | 0.000166 | 0.000001 | 0.005824 | 0.000008 |
| PL-37          | 0.282517 | 0.000036 | 0.000159 | 0.000001 | 0.005485 | 0.000005 |
| <b>MG136-1</b> |          |          |          |          |          |          |
| MG136-1-1      | 0.283019 | 0.000020 | 0.000506 | 0.000002 | 0.003438 | 0.000022 |
| MG136-1-2      | 0.283029 | 0.000037 | 0.000501 | 0.000002 | 0.003417 | 0.000033 |
| MG136-1-3      | 0.282947 | 0.000035 | 0.000512 | 0.000002 | 0.003438 | 0.000035 |
| MG136-1-4      | 0.283001 | 0.000026 | 0.000499 | 0.000002 | 0.003406 | 0.000035 |
| MG136-1-5      | 0.283017 | 0.000029 | 0.000505 | 0.000002 | 0.003374 | 0.000028 |
| MG136-1-6      | 0.282954 | 0.000041 | 0.000505 | 0.000002 | 0.003384 | 0.000026 |
| MG136-1-7      | 0.282984 | 0.000022 | 0.000505 | 0.000002 | 0.003374 | 0.000035 |
| MG136-1-8      | 0.282969 | 0.000030 | 0.000501 | 0.000002 | 0.003449 | 0.000036 |
| MG136-1-9      | 0.282959 | 0.000024 | 0.000511 | 0.000002 | 0.00346  | 0.000070 |
| MG136-1-10     | 0.283021 | 0.000030 | 0.000512 | 0.000002 | 0.003438 | 0.000050 |
| MG136-1-11     | 0.282969 | 0.000028 | 0.000504 | 0.000002 | 0.003438 | 0.000054 |
| MG136-1-12     | 0.283025 | 0.000041 | 0.000513 | 0.000002 | 0.003417 | 0.000021 |
| MG136-1-13     | 0.282942 | 0.000029 | 0.000506 | 0.000002 | 0.003384 | 0.000019 |
| MG136-1-14     | 0.28296  | 0.000030 | 0.000513 | 0.000002 | 0.003384 | 0.000005 |
| MG136-1-15     | 0.283005 | 0.000034 | 0.00052  | 0.000002 | 0.003471 | 0.000014 |
| MG136-1-16     | 0.283003 | 0.000040 | 0.000517 | 0.000002 | 0.003417 | 0.000030 |
| MG136-1-17     | 0.282944 | 0.000029 | 0.000529 | 0.000002 | 0.003514 | 0.000031 |
| MG136-1-18     | 0.283    | 0.000027 | 0.000523 | 0.000002 | 0.003536 | 0.000019 |

|            |          |          |          |          |          |          |
|------------|----------|----------|----------|----------|----------|----------|
| MG136-1-19 | 0.282969 | 0.000044 | 0.000504 | 0.000002 | 0.003438 | 0.000047 |
| MG136-1-20 | 0.282997 | 0.000039 | 0.000513 | 0.000002 | 0.003417 | 0.000059 |
| MG136-1-21 | 0.283027 | 0.000034 | 0.000506 | 0.000002 | 0.003384 | 0.000036 |
| MG136-1-22 | 0.282982 | 0.000030 | 0.000513 | 0.000002 | 0.003384 | 0.000029 |
| MG136-1-23 | 0.282988 | 0.000027 | 0.000515 | 0.000002 | 0.003503 | 0.000019 |
| MG136-1-24 | 0.282971 | 0.000020 | 0.000508 | 0.000002 | 0.003471 | 0.000020 |
| MG136-1-25 | 0.283024 | 0.000032 | 0.000498 | 0.000002 | 0.003417 | 0.000023 |
| MG136-1-26 | 0.283006 | 0.000040 | 0.000529 | 0.000002 | 0.003514 | 0.000023 |
| MG136-1-27 | 0.282998 | 0.000029 | 0.000523 | 0.000002 | 0.003536 | 0.000020 |
| MG136-1-28 | 0.283015 | 0.000026 | 0.000506 | 0.000002 | 0.003417 | 0.000013 |
| MG136-1-29 | 0.282936 | 0.000029 | 0.000503 | 0.000002 | 0.003428 | 0.000014 |
| MG136-1-30 | 0.283017 | 0.000030 | 0.000506 | 0.000002 | 0.003449 | 0.000038 |
